# Supplementary material
Source: HighWire-hosted journal article supplement (doi:10.1101/rna.055988.116)
Supplement: Supplemental_Table_S1.xlsx [file Supplemental_Table_S1.xlsx]

## Sheet: Sheet1
#Table S1. A list of 56 repeat-sequence types of CRISPRs with detailed information.
#description of the columns
#CRISPR: the IDs; IDs starting with"unk*" are for putative novel CRISPRs; others are identified from reference genomes
#type: CRISPR–Cas types; "unk" if type not assigned
#repeat-seq: the sequence of the repeat in the associated array; the sequence is shown in the transcription oriention if the orientation can be inferred
#direction-inferred: Yes if the transcription orientation is determined using metatranscriptomic data; No otherwise
#contig: the number of contigs containing this CRISPR; combined from all the samples
#repeat-copy: copy number of the repeats
#total-reads: total metatranscriptomic reads (combined) that can be mapped to the contigs
#sense-reads: total metatranscriptomic reads mapped to the "sense" strand (for those with orientiation determined); otherwise, just the strand as indicated in the repeat sequence (not necessarily the 'sense' strand)
#antisense-reads: total metatranscriptomic reads mapped to the "antisense" strand (for those with orientation determined); otherwise, just the strand opposite to the strand indicated in the repeat sequence (not necessarily the "antisense" strand)
#sense-reads-ratio(combined): the ratio of sense reads over total reads; again, the "sense" could be actually "antisense" strand for those whose orientiation is not determined.
#X31612082, X310763260 etc: the sense-reads-ratio using the metatranscriptomic reads from one sample only
#
#CRISPR	type	repeat-seq	direction-inferred	contig	repeat-copy	total-reads	sense-reads	antisense-reads	sense-reads-ratio(combined)	X316192082	X310763260	X311245214	X317802115	X316701492	X319146421	X317690558	X317822438	BdentL33-IC	I	GTCGCTCTCCTCACGGAGAGCGTGGATTGAAAT	Yes	780	4128	182	165	17	90.7	50	100	96.8	100	93.8	-	100	100
RinteL36-II	II	GTTGTAATTCCCTGTTATCACTTGGTATGGTATAAT	Yes	36	432	863	814	49	94.3	95.8	-	87.8	-	-	-	0	-
BfragL47-II	II	GTTGTGATTTGCTTTCAAATTAGTATCTTTGAACCATTGGAAACAGC	Yes	528	2832	9894	8700	1194	87.9	97	92.8	89.4	94.5	94.6	71.4	98.3	95.2
AshahL36	II	GTTGTGGTTTGATGTAGAATTTCGATAAGATACAAC	Yes	288	1276	1814	1763	51	97.2	100	98.6	94.6	92.3	93.6	99.1	100	-
MhypeL30-IB	I	ATTTAACTTTAACAAGAGTTGTATTTGAAT	Yes	24	480	1490	1193	297	80.1	80.1	-	-	-	-	-	-	-
FprauL33-IC	I	GTCGCCCTCCTCGCGGAGGGCGTGGATAGAAAT	Yes	448	2984	270	261	9	96.7	100	100	-	50	94.4	100	61.5	100
SparaL32-IC	I	GTCGCTCCCTTCACGGGGGCGTGGATTGAAAT	Yes	80	856	81	81	0	100	100	-	100	100	100	-	-	-
LcaseL28-IE	I	GTTTTCCCCGCACATGCGGGGGTGATCC	No	492	2656	420	214	206	51	96.5	100	81.2	100	66.9	5.5	14.3	88.2
SangiL36-IIA	II	GTTTTTGTACTCTCAAGATTTAAGTAACTGTAAAAC	No	48	196	84	16	68	19	-	-	-	100	-	-	0	10.7
EsiraL30	unk	GTTTGAGAGTAGTGTAAATTTATAGGGTAGTAAAAC	Yes	48	180	121	115	6	95	100	-	-	94.9	-	-	100	85.7
ErectL32-IC	I	GTCGCTCCTCTCGTGGGAGCGTGGATTGAAAT	Yes	316	1812	947	924	23	97.6	95.2	99.2	100	100	88.2	100	97.5	100
EeligL36	unk	GTTTGAATAACCTTAAATAATTTCTACTTTGTAGAT	Yes	24	120	272	268	4	98.5	85.7	100	-	99.2	-	-	-	100
CcatuL36-II	II	GTTTGAGAATGATGTAAAAATGTATGGTACTCAAGC	Yes	200	1496	842	836	6	99.3	100	97.5	-	-	100	100	99.6	98.4
OsplaL30-IB	I	CTTTTAATTGAACTAAGGTAGAATTGAAAC	Yes	72	352	23	23	0	100	-	-	-	-	-	-	100	100
PdistL32-IC	I	GTCGCACCCCGTGTGGGTGCGTGGATTGAAAC	Yes	20	176	253	253	0	100	-	-	100	100	-	-	-	100
ErectL36-II	II	ATTTTAGTAACTGAATAATTTACGTGACTGTAAAAC	Yes	20	232	110	104	6	94.5	-	-	-	-	-	100	100	86.7
MsmitL31-IB	I	GTTAAAAATAAGACTATAATAGGATTGAAAT	Yes	52	328	850	850	0	100	-	-	-	-	-	100	100	-
ElimoL30-IB	I	GTTGAAGATTAACATGAGATGTATTTAAAT	Yes	72	260	29	28	1	96.6	-	-	-	-	-	-	96.6	-
unk-X316192082-1963117-518	unk	GGTTAAGTAACCTATAGTAATTTCTACTGTTGTAGAT	Yes	36	292	49	49	0	100	100	-	-	-	-	-	-	-
unk-X316192082-2009633-19434	II	ATCTTTGACGGACTGCAAACAGCA	Yes	28	68	2268	2082	186	91.8	91.8	-	-	-	-	-	-	-
unk-X311245214-2065066-543	II	GTTTGAGTATGGTGCAATTTTAAAGGGTAGTCAAAC	Yes	20	208	436	432	4	99.1	100	-	98.8	-	-	-	-	-
unk-X316192082-2005243-23	unk	GTATTTACATCCCACTATGTAACTATTAATTC	No	24	324	22	11	11	50	50	-	-	-	-	-	-	-
unk-X310763260-1565175-20174	I	GTCGCGCCCCGCAAGGGGCGCGTGGGTTGAAAT	Yes	128	520	191	191	0	100	100	100	100	100	-	-	100	100
unk-X316192082-1994493-62	I	GTCACTCCTTATGTGGGAGTGTGGATTGAAAC	Yes	60	416	126	126	0	100	100	-	-	-	-	-	-	-
unk-X316701492-1810681-2398	unk	ACTGTTTCCAATGGTTCAAAGATACTTAAATGAAAGCAGACCACAAC	No	96	284	8742	3441	5301	39.4	-	7.7	-	0	0	50.2	-	-
unk-X316192082-2002339-5619	I	GTCTCCCTCTGTATAGAGGGAGAGGATTGAAATA	Yes	24	112	13	13	0	100	100	-	-	-	-	-	-	-
unk-X310763260-1560801-7020	I	GCTGTAGTTCCCGGTTATTACTTGGTATGTTATAAT	Yes	40	164	149	149	0	100	100	100	-	-	-	-	100	-
unk-X317690558-1936873-5667	I	GTCGCCACCCGCGAGGGTGGCGTGGATAGAAAC	No	20	232	24	7	17	29.2	0	-	-	-	-	-	30.4	-
unk-X311245214-1919857-490	unk	GCTGTAGTTCCCTATTATTTCTTGGTATGGTATAATA	Yes	80	516	705	680	25	96.5	100	96.8	33.3	93	-	99.5	97	-
unk-X316701492-1769799-381	II	GTTTGAGAGTCTTGTTAATACGGAAGGATTCAAAAC	Yes	52	244	20	20	0	100	100	100	-	100	100	-	-	100
unk-X317690558-1934147-5915	II	GCTGTTTCCTATATTACAAAGGTACTAAAATGAGAGCAAATCACAAC	No	24	160	101	41	60	40.6	43.3	-	-	-	-	-	18.2	-
unk-X310763260-1523421-10	unk	GTCACACCCTGCGTGGGTGTGTGGATTGAAAC	Yes	100	824	349	346	3	99.1	100	100	100	100	100	-	96	100
unk-X316701492-1805635-420	unk	GTCACTTCCCTCGCGGAAGTGTGGATTGAAAT	Yes	36	292	89	89	0	100	-	100	100	-	100	-	-	-
unk-X317802115-1297766-6327	I	GTCGCACCCCGCACGGGGTACGTGGATTGAAAT	Yes	152	616	154	143	11	92.9	-	100	100	88.2	-	100	-	-
unk-X319146421-1503149-9668	unk	GTTGAGTAACCTTAAATAATTTCTACTATTGTAGAT	Yes	52	276	22	22	0	100	-	-	-	100	-	100	-	-
unk-X310763260-1536491-2103	unk	GTCACACCTCATGTAGGTGTGTGGATTGAAAC	No	40	400	152	76	76	50	-	50	-	-	-	-	0	100
unk-X310763260-1561251-50	II	GTTTGAGAGCTGTGTAAATTCCAAGTACTCTAAAAC	Yes	16	236	36	36	0	100	-	100	-	-	-	-	-	-
unk-X310763260-1527019-988	unk	GTCGCACCCCACGCGGGTGCGTGGATTGAAAC	Yes	28	112	84	84	0	100	-	100	-	100	-	100	-	-
unk-X317822438-1268182-1087	unk	GAATTAATAGATACGTAGTGGAATGTAAAT	Yes	52	580	21	19	2	90.5	-	89.5	100	-	-	-	-	-
unk-X310763260-1498833-183	unk	GTAGATAGAAAAGAACCCCGTTGAGGGGACGAAAAC	Yes	4	16	11	11	0	100	-	100	-	-	-	-	-	-
unk-X317822438-1274180-1919	unk	ATTAAAATAGAGACATAATGGAATGTAAAT	Yes	24	220	127	127	0	100	-	100	-	-	-	-	-	100
unk-X310763260-1559631-152	I	GTTTTAATCCACACTCCTGCACAAGGAGTGAC	No	4	40	393	125	268	31.8	-	31.8	-	-	-	-	-	-
unk-X311245214-2066754-19	II	GTTTGCTAAGTGTGTTAAACAATTAGGGTTCTATAC	Yes	28	104	270	270	0	100	-	-	100	-	-	-	-	-
unk-X311245214-2057726-47	unk	ATTGCAGAAAACCATCTATTAAAATAAGGATTGTGAC	Yes	20	288	48	46	2	95.8	-	-	95.8	-	-	-	-	-
unk-X316701492-1829646-21784	II	GTTGTGGTTTGATGTAGAATTGGAATGAGGAACAAC	Yes	40	204	37	37	0	100	-	-	-	-	100	-	100	-
unk-X317690558-1932429-5060	II	GTTGTTGTTCCCAGTTATCGCTTGGTATGATATAAT	Yes	92	792	356	350	6	98.3	-	-	100	-	-	-	98.2	-
unk-X319146421-1424464-21	I	GAGTTCCCCGCGTAAGCGGGGATGAACCG	Yes	52	208	25	22	3	88	-	-	-	93.3	-	80	-	-
unk-X311245214-2041348-53	unk	GTTTAATACCTTATATAAATTTCTACTATTGTAGAT	Yes	4	68	77	68	9	88.3	-	-	88.3	-	-	-	-	-
unk-X311245214-2041833-919	unk	GTTGTAAATTGCTTTCAAAATTGTATCTTTGTCCTACCGAATACAGC	Yes	8	84	240	239	1	99.6	-	-	99.6	-	-	-	-	-
unk-X311245214-2064508-2009	unk	GTCTATACAGACACTTTAATTTCTACTATTGTAGAT	Yes	4	36	222	210	12	94.6	-	-	94.6	-	-	-	-	-
unk-X317690558-1918583-28	I	CCGTCGCCCCTCCCGCAGGGGCGTGAGTAGAAAT	Yes	76	472	38	38	0	100	-	-	-	100	-	-	100	-
unk-X317690558-1941079-16118	II	GTTTGAGAATAGTGTAAATCCATAAGGTAGTGAAAC	Yes	36	252	38	32	6	84.2	-	-	-	-	100	-	80.6	100
unk-X316701492-1828698-9670	I	GTCGCTCTCCGCAAGGAGGGCGTGGATTGAAAC	Yes	32	308	343	339	4	98.8	-	-	-	-	100	95.3	-	100
unk-X317822438-1266566-1000	unk	GTTGTGAATTGCTTTCATTTTTTGTATCTTTGTGTATAGTTCACAGC	Yes	16	84	96	96	0	100	-	-	-	-	-	-	-	100
unk-X317690558-1831597-115	unk	GTTTGAGAGTAGTGTAAATTCAGAATACAGTAAAAC	Yes	4	28	12	12	0	100	-	-	-	-	-	-	100	-
unk-X317690558-1942387-11272	I	GTTTTAATAGATACATGGTGGAATGTGAAT	Yes	24	396	55	47	8	85.5	-	-	-	-	-	-	85.5	-
